# Supplementary material for: Is There a Role for [18F]FDG PET-CT in Staging MALT Lymphoma?
Source: MDPI journal article supplement (doi:10.3390/cancers14030750), 2022-01-31
Supplement: s1 [file s1]

**Table S1.** Cox analysis for PFS in patients with stage I disease.

| Variable                 | Variable                                            | P    | HR (95% CI)       |
|--------------------------|-----------------------------------------------------|------|-------------------|
| Clinical characteristics | Age                                                 | 0.85 | 1.00 (0.96–1.05)  |
|                          | Female                                              | 0.77 | 1.19 (0.38–3.75)  |
|                          | B symptoms                                          | 0.53 | 1.97 (0.24–16.15) |
|                          | Bulky disease                                       | 0.27 | 2.44 (0.50–11.83) |
|                          | BM involvement                                      | 0.32 | 2.94 (0.35–25.05) |
|                          | Anemia                                              | 0.51 | 1.73 (0.35–8.65)  |
|                          | Thrombocytopenia                                    | 0.11 | 3.97 (0.73–21.44) |
| PET characteristics      | Extranodal lesion detected (vs not detected) on PET | 0.96 | 0.97 (0.29–3.25)  |
|                          | SUVmax of detected extranodal lesion                | 0.09 | 1.08 (0.99–1.17)  |
|                          | MTV of detected extranodal lesion                   | 0.28 | 1.00 (1.00–1.01)  |
|                          | TLG of detected extranodal lesion                   | 0.12 | 1.00 (1.00–1.00)  |
|                          | TLG of extranodal lesion > median TLG               | 0.10 | 2.81 (0.82–9.67)  |

Univariable Cox regression for PFS. Hazard ratios (HR) with 95% confidence intervals (CI) are presented for all analyzed variables. Bulky disease, positive if any lymphoma lesion > 5 cm in any dimension; BM involvement, positive if lymphoma was identified on BM aspirate or biopsy or flow cytometric immunophenotyping; Anemia, positive if hemoglobin < 12.5 g/dL for female or < 13.5 g/dL for male patient; Thrombocytopenia, positive if platelets count < 150,000 platelets per microliter; BM, bone marrow; SUVmax, maximum standardized uptake value; MTV, metabolic tumor volume; TLG, total lesion glycolysis.

**Table S2.** Cox analysis for PFS in patients with stage IV disease.

| Variable                 | Variable                                            | P     | HR (95% CI)         |
|--------------------------|-----------------------------------------------------|-------|---------------------|
| Clinical characteristics | Age                                                 | 0.25  | 1.03 (0.98–1.08)    |
|                          | Female                                              | 0.47  | 1.49 (0.50–4.43)    |
|                          | B symptoms                                          | 0.07  | 4.15 (0.91–18.99)   |
|                          | Bulky disease                                       | 0.12  | 0.20 (0.03–1.55)    |
|                          | BM involvement                                      | 0.79  | 0.84 (0.22–3.16)    |
|                          | Nodal involvement                                   | 0.11  | 3.44 (0.77–15.34)   |
|                          | High Ki-67 index                                    | 0.06  | 15.54 (0.94–256.39) |
|                          | High serum LDH                                      | 0.44  | 0.04 (0–154.70)     |
|                          | Anemia                                              | 0.89  | 0.92 (0.26–3.27)    |
|                          | Thrombocytopenia                                    | 0.01* | 27.48 (2.46–307.73) |
| PET characteristics      | Extranodal lesion detected (vs not detected) on PET | 0.31  | 1.72 (0.60–5.00)    |
|                          | SUVmax of detected extranodal lesion                | 0.81  | 1.03 (0.83–1.26)    |
|                          | MTV of detected extranodal lesion                   | 0.53  | 1.00 (1.00–1.01)    |
|                          | TLG of detected extranodal lesion                   | 0.60  | 1.00 (1.00–1.00)    |
|                          | Nodal disease detected (vs not detected) on PET     | 0.44  | 0.66 (0.23–1.89)    |
|                          | SUVmax of detected nodal disease                    | 0.57  | 1.14 (0.73–1.78)    |
|                          | MTV of detected nodal disease                       | 0.50  | 1.04 (0.93–1.17)    |
|                          | TLG of detected nodal disease                       | 0.34  | 1.01 (0.99–1.04)    |

Univariable Cox regression for PFS. Hazard ratios (HR) with 95% confidence intervals (CI) are presented for all analyzed variables. Bulky disease, positive if any lymphoma lesion > 5 cm in any dimension; Nodal involvement, positive if any lymph node was considered involved in the disease (not necessarily [<sup>18</sup>F]FDG-avid); BM involvement, positive if lymphoma was identified on BM aspirate or biopsy or flow cytometric immunophenotyping; High Ki-67 index, positive if reported > 20%; High serum LDH, positive if > 380 U/L; Anemia, positive if hemoglobin < 12.5 g/dL for female or < 13.5 g/dL for male patient; Thrombocytopenia, positive if platelets count < 150,000 platelets per microliter; BM, bone marrow; LDH, lactate dehydrogenase; SUVmax, maximum standardized uptake value; MTV, metabolic tumor volume; TLG, total lesion glycolysis.
